# Supplementary material
Source: Springer Nature journal article supplement (https://www.springermedizin.de/resource/supplementary/12936_2010_1340_MOESM1_ESM.pdf/9549560)

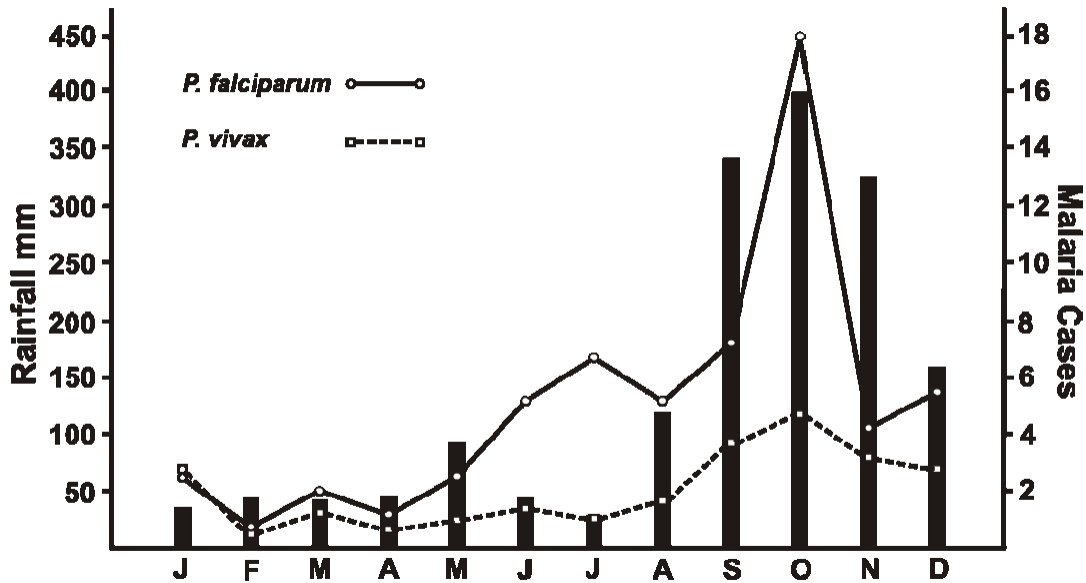

Supplement: MOESM1 [file 9549560]
